# Supplementary material for: Influence of geomagnetic activity on mesopause temperature over Yakutia
Source: Copernicus journal article supplement (doi:10.5194/acp-2017-541), 2017-10-04
Supplement: Supplementary file [file acp-2017-541-AC3-supplement.pdf]

Anonymous Referee #1

We thank you for your positive reception of the manuscript, and for the helpful and constructive comments. As we understood, major points raised by referees is manuscript structure. In the revised version, we tried to follow referee's recommendations.

The reviewer comments are given in normal typeface, *our responses are italicized and bold*.

General comments:

Since much of the discussion focuses on the geomagnetic forcing and in particular energetic particle precipitation (EPP) impact on the mesosphere chemistry and the link to temperatures, it would be beneficial to have a short paragraph of the now well understood effects of EPP in the introduction going into the proposed temperature impacts via ozone modulation in the mesosphere. In the discussion, the link to temperatures is somewhat difficult to follow. I would recommend clarifying this following along the line of these steps:

1. EPP ionisation leads to production of both HO<sub>x</sub> and NO<sub>x</sub> species. This production can be proxied using indices such as Ap. (This is the main link to the Ap-temperature correlations of this study)
2. HO<sub>x</sub> and NO<sub>x</sub> contribute to ozone balance in the mesosphere and stratosphere. These effects are well known as demonstrated by the works cited in the existing text.
3. Model simulations have shown that the EPP driven ozone reduction in the polar winter upper mesosphere leads to reduction in long wave (terrestrial outgoing radiation) cooling. This signal is seen as increase of upper mesospheric temperature when comparing simulations with high EPP forcing to those with no, or low EPP forcing.
4. Higher Ap -> more EPP -> more HO<sub>x</sub> and NO<sub>x</sub> -> less ozone -> impact on polar winter mesospheric temperatures. This effect on temperatures is focused on polar winter atmosphere, which seems to be in a good agreement with the results presented in this manuscript.

It is not clear from the text presently how sensitive the layer of excited hydroxyl used for the temperature measurements is to changes in HO<sub>x</sub> concentrations i.e. those related to EPP. Could you please add a comment? This I think is needed to clarify to the readers whether the observed temperature changes are likely linked to changes in ozone or in HO<sub>x</sub> concentrations.

***Response: In the revised article, part of the discussion concerning an indirect effect on the atmosphere from particle penetration was significantly reduced and moved to the introduction. In the introduction and discussion, the main attention is paid to the response of the temperature of the upper mesosphere / lower thermosphere to geomagnetic activity. This particular paper does not process HO<sub>x</sub> at all. We used the rotational temperature of OH (6-2) band as a proxy of the neutral temperature of the atmosphere. The auroral atomic oxygen line is superimposed on the OH spectrum so that it is impossible to correctly calculate the rotational temperature. Thus, the spectra obtained during the aurora were excluded from the study.***

Specific comments and text revisions:

Page 1 L7: "beginning of the 24th" L11-13: "The maximum of the seasonally averaged temperatures is delayed by 2 years relative to the maximum of flux of radio emission from the Sun with a wavelength of 10.7 cm, and correlates with a change in geomagnetic activity. Ap-index as a measure of geomagnetic activity is taken." Change to "The maximum of the seasonally averaged temperatures is delayed by 2 years relative to the maximum of solar radio emission flux (wavelength of 10.7 cm), and correlates with a change in geomagnetic activity (Ap-index)." **The sentence was corrected.**

L19-20: "The review of Beig et al. (2008) lists numerous studies showing that the response: : :". **Corrected.**

L21: Add the abbreviation F10.7 here as it is used later: “solar radio flux at a wavelength of 10.7 cm in 10-22 W M-2 Hz-1 (F10.7)”. **Abbreviation F10.7 was added.**

L22-23: “SABER radiometer onboard the TIMED satellite”. **Corrected.**

L23-24: “100 SFU, in agreement with the”. **Corrected.**

L26-30: You should make it clearer in this paragraph that the first studies only used a very short period of observations. **The sentence “This study only used a very short period of observations which coincided with the maximum of solar activity.” is included.**

L35-36: I recommend revising this to: “ As this is similar in scale to the observed delay of 25 months, it was logical to assume that the long-term temperature fluctuation of the subauroral mesopause correlates with the change in geomagnetic activity.” **Sentence is changed according your recommendation.**

L37: “: :between geomagnetic activity (Ap-index) and: :” **The purpose of paper is described as: “to find geomagnetic signatures in night measurements of OH rotational temperature obtained for the period August 1999 to May 2015”.**

Page 2 L2: “Mesopause (80-100 km) is the atmosphere region where the mesosphere borders on a thermosphere: :” **Sentence is changed according your recommendation.**

L4: Does “activated” here refer to “excited”? **“activated” is replaced by “excited”.**

L4: “: :hydroxyl molecule experiences: :” **“commits” is replaced by “experiences”.**

L8: “optical station Maimaga (63°N, 129.5°E) which is located at a distance of about 120 km to the north of Yakutsk” suggest changing to “optical station of Maimaga (63°N, 129.5°E) located about 120 km north of Yakutsk, Russia.” Could you also give the magnetic latitude of the station? **The sentence is changed. Geomagnetic coordinates of Maimaga station are added in text.**

L10: What is the significance of not having aurora present when the observations are made? This would have an impact on observing the direct EPP effect as particle precipitation can be associated with aurora displays. **The reason is described in the “Instrumentation and measurement technique” as: “The atomic oxygen line which arises at high auroral activity superimposes on OH(6-2) spectrum. To avoid systematic errors in evaluating the temperature because of this, the data obtained in the absence of aurora were selected for the analysis”.**

L17-19: These 2 sentences are presently not clear. **These sentences are replaced by:” The temperature corresponding to that model spectrum, which deviates least from the real spectrum, by not more than the registration noise, is considered as a best fit to the real hydroxyl rotational temperature. The random errors in measuring the temperature are typically 2-10 K, depending on signal-to-noise ratio.”**

L27: “: :Ap-index mean values are shown: :” **“... variations ...” is excluded.**

L30: “The correlation coefficient of TOH and Ap-index is equal  $0.51 \pm 0.1$  at 95% confidence level.” Remove word “equal”. What is the correlation of F10.7 and TOH in your present dataset? **The sentence is changed to text: “The correlation coefficient of TOH and Ap-index is 0.51. The significance of correlation coefficient was tested with 14 degrees of freedom T-test. The critical value of correlation coefficient is 0.46 at the 0.05 level of significance. TOH is not significantly correlate with F10.7, because correlation coefficient 0.36 is less than critical value. The correlation coefficient increases to 0.65 when F10.7 leads the temperature by 2 years.”.**

Paragraph starting at line 31: How were the two Ap groups selected, what is the transition value of 8 based on? **“The average AP in the observation interval of about 8 was chosen as the transition value”.**

Page 3 L1: “: : many papers have been published on the atmosphere response to solar and magnetospheric proton: :” ***The phrase “In the last decade, many papers have been published on the atmosphere response to the proton and electron fluxes with various energies” is shifted to “Introduction”. As was mentioned above, part of the discussion concerning an indirect effect on the atmosphere from particle penetration was significantly reduced and transferred to the Introduction. P3 L1-L5 were moved to Introduction. P3 L6-L20 were deleted.***

L6-7: “Observations from satellites confirm that energetic particle precipitation changes the NO<sub>x</sub> amount in the atmosphere.” - ***deleted***

L8: “: : from satellite measurements during the years 1992: :” - ***deleted***

L10: ECHAM5/MESSy is the same as the EMAC model, EMAC stands for - ***deleted***

“ECHAM5/MESSy Atmospheric Chemistry” i.e. 2 of the studies mentioned in the Discussion are from the same model. - ***deleted***

L11-12: “They calculated thermospheric NO<sub>x</sub> fluxes to the mesosphere from precipitation of low-energy electrons using the average annual Ap from 1991 to 2005.” - ***deleted***

L12-14: “These average annual NO<sub>x</sub> concentrations were based on the UARS/HALOE measurements reported by Randall et al., (2007).” The NO<sub>x</sub> model of Baumgaertner et al. was based on the Randall et al. measurements, they were then compared with independent observations by the MIPAS instrument onboard Envisat as reported by Funke et al. (2005) (see reference in Baumgaertner et al., 2009). – ***deleted***

L15-16: I think what you should say is that that the authors of that paper demonstrated that Ap works as a good proxy for low-energy produced NO<sub>x</sub>. That particular paper does not handle HO<sub>x</sub> at all. But there are others which show the direct impact of electron precipitation on HO<sub>x</sub>, for example: Andersson, M. E., P. T. Verronen, S. Wang, C. J. Rodger, M. A. Clilverd, and B. R. Carson (2012), Precipitating radiation belt electrons and enhancements of mesospheric hydroxyl during 2004–2009, J. Geophys. Res., 117, D09304, doi:10.1029/2011JD017246. ***Yes, this particular paper does not process HO<sub>x</sub> at all. We used the rotation temperature OH (6-2) as a proxy of the neutral temperature of the atmosphere. The auroral atomic oxygen line is superimposed on the OH spectrum so that it is impossible to correctly calculate the rotational temperature. Thus, the spectra obtained during the aurora were excluded from the study.***

L17: They demonstrated both mesospheric and stratospheric ozone changes. – ***deleted***.

L21: “There is a publication series: : :” change to “There are several publications: : :” – ***corrected***.

L27-30: A similar downwards descending signal (in the same model) is already demonstrated by Baumgaertner et al (2011) using Geopotential height anomalies. ***This sentence is included in the text of Discussion.***

L30: “moves” - ***corrected***

L32-33: Not all models are limited to this altitude range, but many reanalysis datasets are limited to altitudes below the stratopause. Models have issues in comprehensive inclusion of EPP. ***This sentence is rewritten as: “It should be noted that model and experimental researches of meteorological parameters are limited to a height below ~80 km.”***

L34: “Therefore, warming in our measurements has to be detected earlier.” I don’t understand why this would have to be the case. These temperature signals can be completely independent. That doesn’t mean they would not be linked to geomagnetic activity or EPP. ***The phrase “Nevertheless, it cannot be ruled out that the temperature rise of the upper mesosphere in geomagnetic active years is due to the in situ effect of EPP” is incorporate to the Conclusion.***

Page 3 L16-17: “Warming signal moves down from high altitude to low one.” And most of the last paragraph. This is not necessarily the case and certainly this is not a conclusion you can make based on

the present study. Several of the publications you have cited actually argue that the stratosphere temperature signals are driven by changes in dynamics and are not related to in situ changes in ozone.

Figure 1: It is very difficult to tell the two lines apart, I would suggest making the plot in colour or applying an offset to separate the lines. Additional typos and general language comments - “Energetic particle precipitation” (and the abbreviation EPP) is the generally used term. It is singular, therefore “EPP is: : :”. Be careful not to use “energetic particles precipitation” or “particles precipitation”, or “precipitations”. **Figure 1 and Figure 4 are colored. Abbreviation EPP is used.**

- NO<sub>x</sub> and HO<sub>x</sub> - the x is a subscript – **corrected**.

- The commonly used terms for both are NO<sub>x</sub> = “Odd Nitrogen”, HO<sub>x</sub> = “Odd hydrogen” instead of “nitrogen oxides” etc. – **corrected**.

- The author with two papers in the citation list is “Seppälä”, the name is correct in the citation list but incorrect in the text. – **corrected**.
